# Supplementary material
Source: publisher figshare collection journal article supplement (https://sage.figshare.com/ndownloader/files/22011426)
Supplement: Supplementary file 1 [file 22011426]

**Supplementary Table 1.** Preliminary items, item–total correlation, and communality index used in the survey for health-care professionals

|                         | Item<br>no. | Questionnaire                                                                                                                                                                                                   | Average | Item–total<br>correlation | Commun<br>ality<br>index |
|-------------------------|-------------|-----------------------------------------------------------------------------------------------------------------------------------------------------------------------------------------------------------------|---------|---------------------------|--------------------------|
| Cognition<br>(12 items) | 1           | It is the health-care professionals' responsibility to provide medical service (including care, nursing, treatment, and examination) to persons with disabilities.                                              | 4.35    | 0.407                     | 0.496                    |
|                         | 2           | Health-care institutions must provide proper accommodation and equipment for persons with disabilities to enable them to enjoy the same quality of health-care service as that of persons without disabilities. | 4.54    | 0.399                     | 0.544                    |
|                         | 3           | Health-care professionals have to help persons with disabilities to understand their health issues and make decisions for themselves.                                                                           | 4.37    | 0.399                     | 0.528                    |
|                         | 4           | Health-care professionals must be equipped with the knowledge and skills necessary for the clinical treatment of persons with disabilities.                                                                     | 4.31    | 0.448                     | 0.480                    |
|                         | 5           | Medical care for persons with disabilities takes up more time than that for persons without disabilities. *                                                                                                     | 1.63    | 0.058                     | 0.436                    |
|                         | 6           | Management for persons with disabilities causes physical and mental strain. *                                                                                                                                   | 2.22    | 0.203                     | 0.467                    |
|                         | 7           | Medical care for persons with disabilities requires more attention to non-medical issues, including transfer and communication.                                                                                 | 1.83    | -0.021                    | 0.295                    |
|                         | 8           | It is hard to devote sufficient time and make adequate effort for                                                                                                                                               | 2.20    | 0.182                     | 0.304                    |

|                                              |    |                                                                                                                                   |      |       |       |
|----------------------------------------------|----|-----------------------------------------------------------------------------------------------------------------------------------|------|-------|-------|
|                                              |    | persons with disabilities because of my heavy daily workload<br>(including the number of patients and treatments per day). *      |      |       |       |
| Lack of knowledge<br>and skills<br>(4 items) | 9  | I am aware of the basic characteristics of disabilities, including the types of disability and assistive equipment.               | 2.94 | 0.479 | 0.576 |
|                                              | 10 | I am aware of how to communicate with and provide guidance to persons with disabilities according to their type of disability.    | 2.85 | 0.515 | 0.698 |
|                                              | 11 | I am aware of the risks involved in disability and disease, and the precautions required when managing persons with disabilities. | 2.98 | 0.482 | 0.704 |
|                                              | 12 | I can manage persons with disabilities in a calm manner even in unexpected situations.                                            | 3.09 | 0.529 | 0.595 |
| Feelings<br>(6 items)                        | 13 | I feel uncomfortable when dealing with persons with disabilities. *                                                               | 3.46 | 0.568 | 0.548 |
|                                              | 14 | I am embarrassed because I do not know how to manage persons with disabilities. *                                                 | 3.43 | 0.582 | 0.547 |
|                                              | 15 | I feel irritated when managing persons with disabilities. *                                                                       | 3.78 | 0.589 | 0.593 |
|                                              | 16 | I feel that managing people with disabilities is burdensome. *                                                                    | 3.39 | 0.575 | 0.634 |
|                                              | 17 | It feels rewarding to manage persons with disabilities. *                                                                         | 3.53 | 0.344 | 0.366 |
|                                              | 18 | I am willing to treat persons with disabilities. *                                                                                | 3.91 | 0.460 | 0.437 |
| Communication<br>and guidance<br>(6 items)   | 19 | I check how to communicate when I treat persons with disabilities, particularly those with hearing or speech difficulty.          | 3.86 | 0.420 | 0.296 |
|                                              | 20 | I communicate with a guardian or assistant, rather than with the person concerned, when identifying or explaining the             | 2.37 | 0.185 | 0.119 |

|                                |    |                                                                                                                                                               |      |       |       |
|--------------------------------|----|---------------------------------------------------------------------------------------------------------------------------------------------------------------|------|-------|-------|
|                                |    | condition of the persons with disabilities. *                                                                                                                 |      |       |       |
| Behavior<br>(10 items)         | 21 | I treat persons with disabilities respectfully as adults when I treat them, particularly those with low intelligence or autism.                               | 3.74 | 0.457 | 0.334 |
|                                | 22 | I assist people with visual impairments to move comfortably when they enter and leave the office.                                                             | 3.99 | 0.436 | 0.521 |
|                                | 23 | I provide treatment-related information to persons with disabilities using methods appropriate to their type of disability.                                   | 3.72 | 0.586 | 0.540 |
|                                | 24 | I am willing to help wheelchair users if they need help in moving from their wheelchair to an examination table.                                              | 4.24 | 0.429 | 0.551 |
| Medical treatment<br>(4 items) | 25 | I evaluate the conditions of persons with disabilities and listen to their requests as carefully as possible and reflect on them as I examine and treat them. | 4.00 | 0.572 | 0.672 |
|                                | 26 | I consider the characteristics of the disability when managing persons with disabilities.                                                                     | 3.94 | 0.616 | 0.711 |
|                                | 27 | I reflect the gender characteristic when managing persons with disabilities.                                                                                  | 3.81 | 0.502 | 0.536 |
|                                | 28 | I make great effort to adequately accommodate persons with disabilities during treatment.                                                                     | 3.97 | 0.605 | 0.697 |

\*Coding was reversed for starred items. Higher scores indicate more positive attitudes toward disability

**Supplementary Table 2.** Attitude toward Persons with Disability in Health Care

Please circle the appropriate number which best corresponds with your opinions or experience about management (including nursing, treatment, and examination) of disabilities.

|                                                                                                                                                                                                                    | Strongly<br>Disagree | Somewhat<br>Disagree | Neutral | Somewhat<br>Agree | Strongly<br>Agree |
|--------------------------------------------------------------------------------------------------------------------------------------------------------------------------------------------------------------------|----------------------|----------------------|---------|-------------------|-------------------|
| 1. I am aware of the basic characteristics of disabilities, including the types of disability and assistive equipment.                                                                                             | 1                    | 2                    | 3       | 4                 | 5                 |
| 2. I am aware of how to communicate with and provide guidance to persons with disabilities according to their type of disability.                                                                                  | 1                    | 2                    | 3       | 4                 | 5                 |
| 3. I am aware of the risks involved in disability and disease, and the precautions required when managing persons with disabilities.                                                                               | 1                    | 2                    | 3       | 4                 | 5                 |
| 4. I can manage persons with disabilities in a calm manner even in unexpected situations.                                                                                                                          | 1                    | 2                    | 3       | 4                 | 5                 |
| 5. It is the health-care professionals' responsibility to provide medical service (including care, nursing, treatment, and examination) to persons with disabilities.                                              | 1                    | 2                    | 3       | 4                 | 5                 |
| 6. Health-care institutions must provide proper accommodation and equipment for persons with disabilities to enable them to enjoy the same quality of health-care service as that of persons without disabilities. | 1                    | 2                    | 3       | 4                 | 5                 |
| 7. Health-care professionals have to help persons with disabilities to understand their health issues and make decisions for themselves.                                                                           | 1                    | 2                    | 3       | 4                 | 5                 |
| 8. Health-care professionals must be equipped with the knowledge and skills necessary for the clinical treatment of persons with disabilities.                                                                     | 1                    | 2                    | 3       | 4                 | 5                 |

Please circle the appropriate number which best corresponds with your action or emotion about management (including nursing, treatment, and examination) of disabilities.

|                                                                                                                                                                   | Strongly<br>Disagree | Somewhat<br>Disagree | Neutral | Somewhat<br>Agree | Strongly<br>Agree |
|-------------------------------------------------------------------------------------------------------------------------------------------------------------------|----------------------|----------------------|---------|-------------------|-------------------|
| 9. I treat persons with disabilities respectfully as adults when I treat them, particularly those with low intelligence or autism.                                | 1                    | 2                    | 3       | 4                 | 5                 |
| 10. I assist people with visual impairments to move comfortably when they enter and leave the office.                                                             | 1                    | 2                    | 3       | 4                 | 5                 |
| 11. I provide treatment-related information to persons with disabilities using methods appropriate to their type of disability.                                   | 1                    | 2                    | 3       | 4                 | 5                 |
| 12. I am willing to help wheelchair users if they need help in moving from their wheelchair to an examination table.                                              | 1                    | 2                    | 3       | 4                 | 5                 |
| 13. I evaluate the conditions of persons with disabilities and listen to their requests as carefully as possible and reflect on them as I examine and treat them. | 1                    | 2                    | 3       | 4                 | 5                 |
| 14. I consider the characteristics of the disability when managing persons with disabilities.                                                                     | 1                    | 2                    | 3       | 4                 | 5                 |
| 15. I reflect the gender characteristic when managing persons with disabilities.                                                                                  | 1                    | 2                    | 3       | 4                 | 5                 |
| 16. I make great effort to adequately accommodate persons with disabilities during treatment.                                                                     | 1                    | 2                    | 3       | 4                 | 5                 |
| 17. I feel uncomfortable when dealing with persons with disabilities.                                                                                             | 1                    | 2                    | 3       | 4                 | 5                 |
| 18. I am embarrassed because I do not know how to manage persons with disabilities.                                                                               | 1                    | 2                    | 3       | 4                 | 5                 |
| 19. I feel irritated when managing persons with disabilities.                                                                                                     | 1                    | 2                    | 3       | 4                 | 5                 |
| 20. I feel that managing people with disabilities is burdensome.                                                                                                  | 1                    | 2                    | 3       | 4                 | 5                 |

**Supplementary Table 3.** Korean version of the Attitude toward Persons with Disability in Health Care scale

**보건의료전문가의 장애인에 대한 태도 척도**

귀하가 일하는 곳에서 장애인 환자를 진료 (간호, 치료, 처치, 검사 포함) 하는 상황을 떠올리며 귀하의 감정이나 행동과 가장 가까운 곳에 응답해 주십시오.

|                                                                   | 전혀 그렇지 않다 | 그렇지 않다 | 보통이다 | 그렇다 | 거의 항상 그렇다 |
|-------------------------------------------------------------------|-----------|--------|------|-----|-----------|
| 1. 나는 장애 유형이나 보조기기 등 장애와 관련된 기본적인 특성을 알고 있다.                      | 1         | 2      | 3    | 4   | 5         |
| 2. 나는 장애 유형별 의사소통 방법과 안내 방법을 알고 있다.                               | 1         | 2      | 3    | 4   | 5         |
| 3. 나는 장애나 질환에 따른 위험성이나 진료시 주의사항에 대해 알고 있다.                        | 1         | 2      | 3    | 4   | 5         |
| 4. 나는 장애인 진료시 예상치 못한 상황에서도 침착하게 대처할 수 있다.                         | 1         | 2      | 3    | 4   | 5         |
| 5. 장애인을 진료(간호, 치료, 처치, 검사 포함)하는 것은 의료진의 책무이다.                     | 1         | 2      | 3    | 4   | 5         |
| 6. 장애인이 비장애인과 동등한 질의 의료서비스를 이용할 수 있도록 의료기관은 장애인 편의시설과 장비를 갖추어야 한다 | 1         | 2      | 3    | 4   | 5         |
| 7. 장애인 환자가 자신의 건강 문제를 이해하여 스스로 선택하고                               | 1         | 2      | 3    | 4   | 5         |

---

결정할 수 있도록 돕는 것이 중요하다

|                                                                |   |   |   |   |   |
|----------------------------------------------------------------|---|---|---|---|---|
| 8. 보건의료인은 장애유형별 특성이나 진료원칙 등 장애인 진료에 필요한 지식이나 기술을 필수적으로 갖추어야 한다 | 1 | 2 | 3 | 4 | 5 |
|----------------------------------------------------------------|---|---|---|---|---|

---

귀하가 일하는 곳에서 장애인 환자를 진료 (간호, 치료, 처치, 검사 포함) 하는 상황을 떠올리며 귀하의 감정이나 행동과 가장 가까운 곳에 응답해 주십시오.

|                                                      | 전혀 그렇지 않다 | 그렇지 않다 | 보통이다 | 그렇다 | 거의 항상 그렇다 |
|------------------------------------------------------|-----------|--------|------|-----|-----------|
| 9. 나는 지능이 낮거나 자폐 성향이 있는 장애인을 진료할 때 성인으로 존중하여 대한다.    | 1         | 2      | 3    | 4   | 5         |
| 10. 나는 시각장애인이 진료실에 들어오거나 나갈 때 편안하게 이동할 수 있도록 돕는다.    | 1         | 2      | 3    | 4   | 5         |
| 11. 나는 장애인에게 진료관련 정보를 설명할 경우 장애 유형에 적합한 방법으로 전달한다.   | 1         | 2      | 3    | 4   | 5         |
| 12. 나는 장애인이 휠체어에서 진찰대로 이동하는 경우 등 도움이 필요하다면, 기꺼이 돕는다. | 1         | 2      | 3    | 4   | 5         |
| 13. 나는 장애인 진료시 장애인의 상태나 요구사항을 최대한 경청하여 진료에 반영한다.     | 1         | 2      | 3    | 4   | 5         |
| 14. 나는 장애인 진료시 장애인의 장애 특성을 고려하여 진료에 반영한다.            | 1         | 2      | 3    | 4   | 5         |
| 15. 나는 장애인 진료시 장애인의 성별 특성을 고려하여 진료에 반영한다.            | 1         | 2      | 3    | 4   | 5         |
| 16. 나는 장애인 진료시 장애인에게 진료시 필요한 편의를 제공하기 위해 최대한 노력한다.   | 1         | 2      | 3    | 4   | 5         |
| 17. 나는 장애인을 응대하는 것이 불편하다                             | 1         | 2      | 3    | 4   | 5         |



|                                  |   |   |   |   |   |
|----------------------------------|---|---|---|---|---|
| 18. 나는 장애인을 어떻게 진료해야 할지 몰라 당황스럽다 | 1 | 2 | 3 | 4 | 5 |
| 19. 나는 장애인을 진료하는 것이 성가시다.        | 1 | 2 | 3 | 4 | 5 |
| 20. 나는 장애인을 진료하는 것이 부담스럽다        | 1 | 2 | 3 | 4 | 5 |
